# Supplementary material
Source: MDPI journal article supplement (https://www.mdpi.com/2073-4468/13/2/35)
Supplement: s1 [file s1]

# SUPPLEMENTAL FIGURE LEGENDS

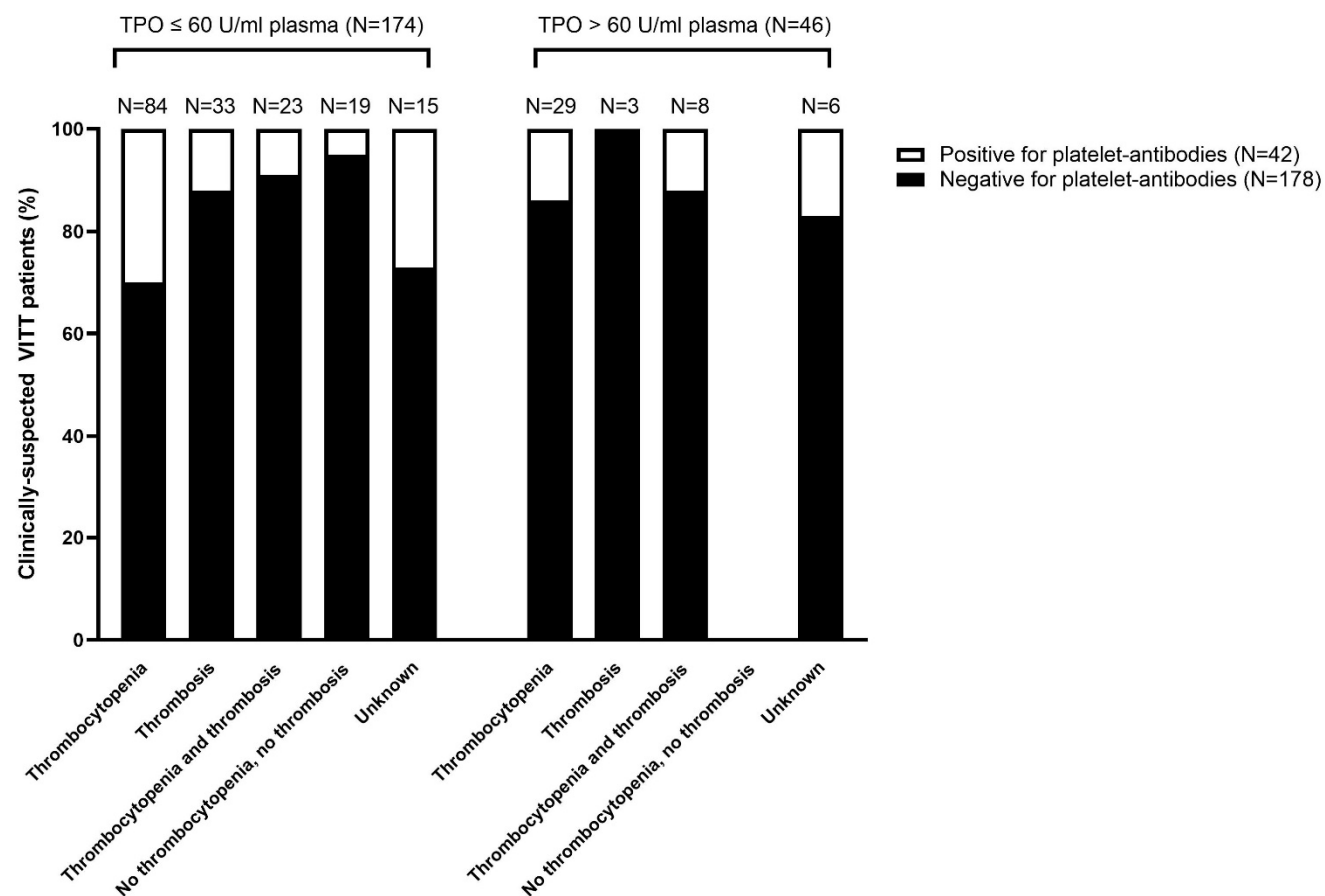

Figure S1: Analysis of TPO levels of 42 platelet-antibody positive patients and of 178 platelet-antibody negative patients. Out of the 42 platelet-antibody positive patients 36 patients had normal TPO levels and six patients had elevated TPO levels. Of the patients that tested negative for platelet-antibodies: 138 patients had normal TPO levels and 40 patients had elevated TPO levels.

SUPPLEMENTAL TABLES

Supplemental Table S1: Details HIT-like VITT patients tested for platelet-antibodies. Patients who were considered HIT-like VITT patients (with thrombocytopenia and thrombosis) and were tested for the presence of platelet-antibodies in the indirect MAIPA. \*Patient 2 was tested at 20 days after vaccination but was not considered probable VITT after a negative FcγRIIa-dependent PIPAA at 22 days after vaccination, the second FcγRIIa-dependent PIPAA at 42 days after vaccination was positive.

| Patient | Sex (M/F) | Age | Vaccine         | Dose | Days since vaccination | anti-PF4 ELISA (OD) | FcγRIIa-dependent PIPAA(+/-) | Platelet count at admission | Site thrombosis       | Indirect MAIPA (+/-) | TPO levels     |
|---------|-----------|-----|-----------------|------|------------------------|---------------------|------------------------------|-----------------------------|-----------------------|----------------------|----------------|
| 1       | M         | 67  | ChAdOx1 nCov-19 | -    | 12                     | >3.0                | +                            | <100                        | CVST                  | -                    | 28             |
| 2*      | F         | 32  | ChAdOx1 nCov-19 | -    | 42                     | 2.1                 | +                            | <100                        | Mesenteric thrombosis | -                    | 24             |
| 3       | F         | 75  | ChAdOx1 nCov-19 | -    | -                      | >3.0                | +                            | <100                        | DVT                   | -                    | 67 (elevated)  |
| 4       | M         | 64  | ChAdOx1 nCov-19 | 1    | 9                      | >3.0                | +                            | <100                        | Intracranial          | -                    | 115 (elevated) |
| 5       | M         | 61  | ChAdOx1 nCov-19 | -    | -                      | >3.0                | +                            | <100                        | Multiple              | -                    | 14             |
| 6       | F         | 28  | Ad26.COVS2.S    | 1    | 11                     | 2.24                | +                            | <100                        | CVST                  | -                    | 22             |
| 7       | F         | 53  | Ad26.COVS2.S    | 1    | -                      | >3.0                | +                            | <100                        | Other                 | -                    | 15             |

Supplemental Table S2: Results from anti-PF4 IgG ELISA, FcγRIIa-dependent PIPAA and indirect MAIPA. \* considered HIT-like VITT patients. † tested positive in both the anti-PF4 IgG ELISA and PIPAA but did not have thrombocytopenia and thrombosis or clinical characteristics were unknown.

| Clinical characteristics                  | anti-PF4 IgG ELISA | FcγRIIa-dependent PIPAA (pos/neg) | Indirect MAIPA (pos/neg) |
|-------------------------------------------|--------------------|-----------------------------------|--------------------------|
| Thrombocytopenia only (n=119)             | Neg (n=111)        | Neg (n=108)                       | Neg (n=79)               |
|                                           |                    |                                   | Pos (n=29)               |
|                                           |                    | Pos (n=3)                         | Neg (n=1)                |
|                                           |                    |                                   | Pos (n=2)                |
|                                           | Pos (n=8)          | Neg (n=5)                         | Neg (n=5)                |
|                                           |                    | Pos (n=3)†                        | Neg (n=3)                |
| Thrombosis only (n=39)                    | Neg (n=38)         | Neg (n=36)                        | Neg (n=33)               |
|                                           |                    |                                   | Pos (n=3)                |
|                                           |                    | Pos (n=2)                         | Neg (n=1)                |
|                                           |                    |                                   | Pos (n=1)                |
|                                           | Pos (n=1)          | Pos (n=1)†                        | Neg (n=1)                |
| Thrombocytopenia and thrombosis (n=32)    | Neg (n=22)         | Neg (n=21)                        | Neg (n=20)               |
|                                           |                    |                                   | Pos (n=1)                |
|                                           |                    | Pos (n=1)                         | Pos (n=1)                |
|                                           | Pos (n=10)         | Neg (n=3)                         | Neg (n=2)                |
|                                           |                    | Pos (n=7)*                        | Pos (n=1)                |
| Clinical characteristics unknown (n=23)   | Neg (n=22)         | Neg (n=22)                        | Neg (n=18)               |
|                                           |                    |                                   | Pos (n=4)                |
|                                           |                    |                                   | Pos (n=1)                |
| No thrombocytopenia, no thrombosis (n=19) | Neg (n=19)         | Neg (n=19)                        | Neg (n=18)               |
|                                           |                    |                                   | Pos (n=1)                |

Supplemental Table S3: Requests for ITP diagnostic reference testing. Increase in platelet-autoantibody testing and positive tests after implementation of the ITP guidelines in June 2020 and a further increase in testing and positive tests since the start of the vaccination on January 8, 2021.

| Time period          | Patients tested positive for platelet-autoantibodies of total number of tests performed N(%) |
|----------------------|----------------------------------------------------------------------------------------------|
| July-December 2019   | 132 (42.6)                                                                                   |
| January-June 2020    | 128 (46.9)                                                                                   |
| July – December 2020 | 166 (38.1)                                                                                   |
| January – June 2021  | 240 (44.6)                                                                                   |
| July-December 2021   | 228 (42.0)                                                                                   |
| January -June 2022   | 273 (48.3)                                                                                   |
